# Supplementary material
Source: Springer Nature journal article supplement (https://www.springermedizin.de/resource/supplementary/12865_2007_140_MOESM3_ESM.pdf/9428594)

Specimen\_001-Pre-Sort

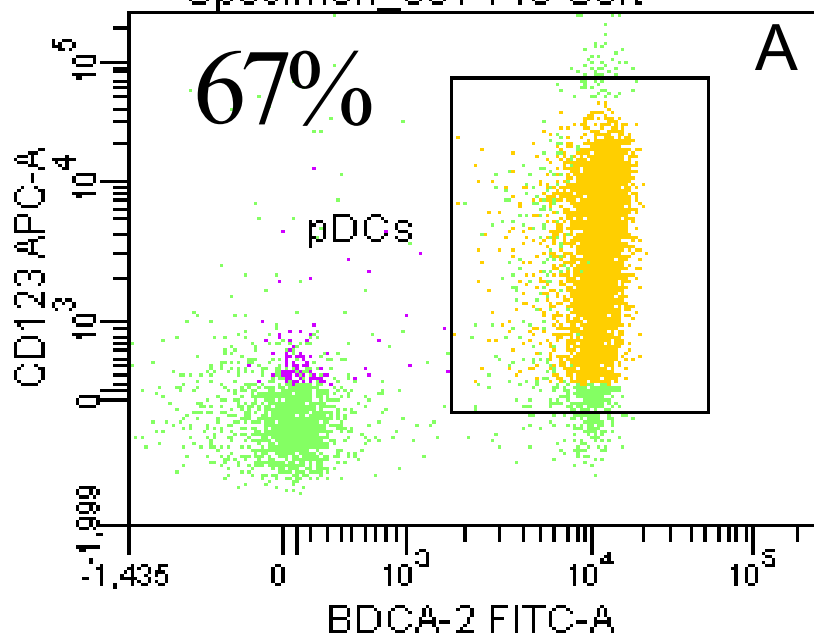

Specimen\_001-Post-Sort pDCs

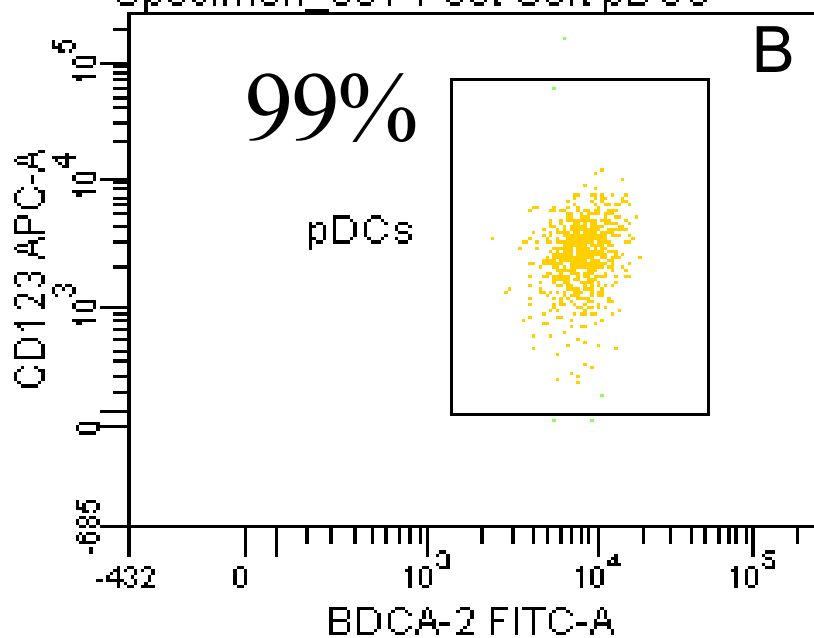

Supplement: MOESM3 [file 9428594]
